# Supplementary material
Source: Springer Nature journal article supplement (https://www.springermedizin.de/resource/supplementary/12887_2011_591_MOESM1_ESM.pdf/9475848)

ART-naïve HIV-infected children enrolled in care  
**332**

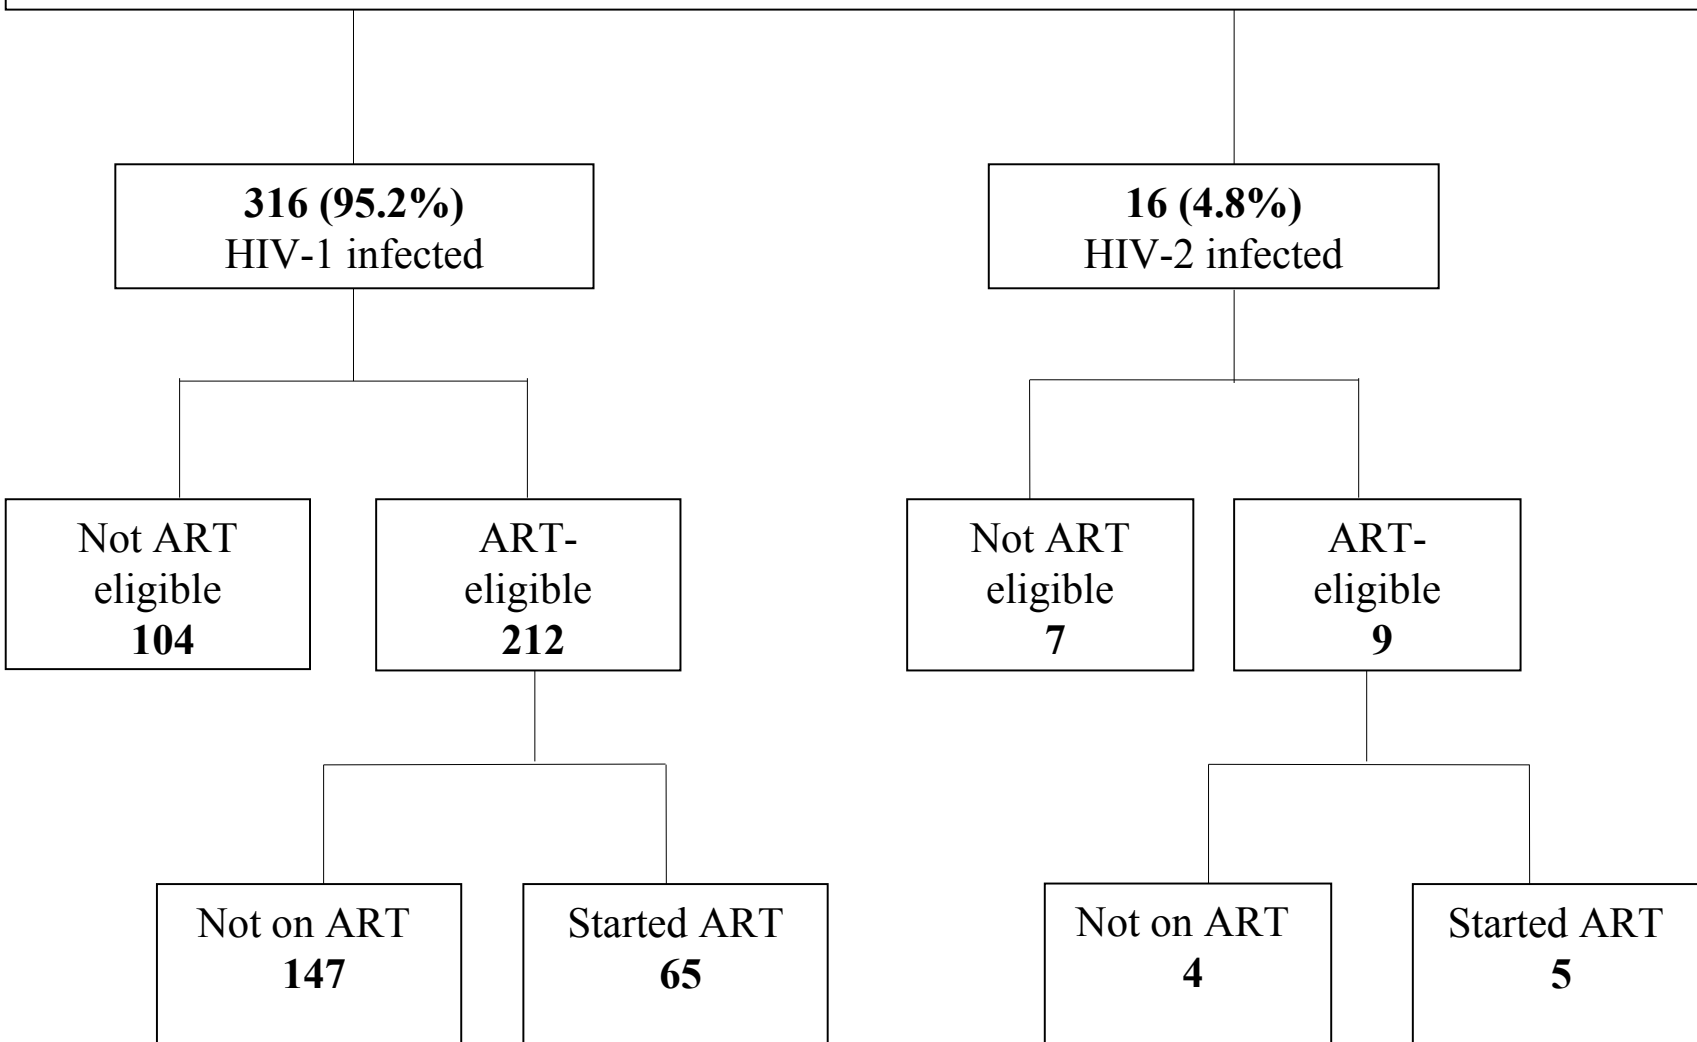

Supplement: MOESM1 [file 9475848]
